# Supplementary material
Source: Royal Society of Chemistry journal article supplement (doi:10.1039/d6nj01056c)
Supplement: d6nj01056c1.pdf [file d6nj01056c1.pdf]

## Supporting Information

### **Boosting microbial fuel cell performance by improving conductivity and electrogenic bacteria abundance on ZIF-67/Fe-polypyrrole**

Yukun Ma,<sup>a, b, 1</sup> Lingping Wan,<sup>a,1</sup> Yuxuan Chen,<sup>a</sup> Huodi Wang, Jun Xuan,<sup>a</sup> Qi Zhou,<sup>a</sup> Yutao Wang,<sup>a\*</sup>

Zhengjie Liu<sup>a</sup> and Yingqiang Sun<sup>a,b,c\*</sup>

<sup>a</sup> School of Chemistry & Chemical Engineering, School of Life Sciences and Medical Engineering, School of Material Science & Engineering, Anhui University, Jiulong Rd 111, Hefei, Anhui, 230601, P.R. China

<sup>b</sup> Anhui Provincial Key Laboratory of Green Carbon Chemistry, Fuyang Normal University, Fuyang, Anhui, 236037, P. R. China

<sup>c</sup> Key Laboratory of Structure and Functional Regulation of Hybrid Materials (Anhui University), Ministry of Education, Hefei, Anhui, 230601, P.R. China

#### **Corresponding Author**

\*Email: 24714@ahu.edu.cn (Y. Wang).

\*Email: syq38@mail.ustc.edu.cn (Y. Sun).

<sup>1</sup> These two authors contributed equally

## **Experimental**

### **Text S1. Pretreatment of materials**

Carbon felts (CF) were cut into 2×2 cm, soaked in acetone for 4 h to remove the surface organic matter, dried, and then rinsed with ethanol and secondary water for several times before drying, and the carbon felts were treated in a muffle furnace at 400 °C for 0.5 h to carbonize the surface. The commercial nafion117 proton exchange membrane was placed in 5% wt H<sub>2</sub>O<sub>2</sub> and heated at 80 °C for 1 h. Then placed in 5% wt HCl and heated at 80 °C for 1 h. The membrane was rinsed with water for several times in the second rinse to neutrality and then prepared for use. The carbon rods used for cathode were polished with sandpaper of different purposes to remove the surface oil.

### **Text S2. Configuration of anode culture medium**

When configuring Wolfe's medium, Wolfe's mineral solution was prepared by first adding NTA in 500 mL of secondary water, adjusting the solution pH to 6.5-7.0 with sodium hydroxide solution at pH 14, then adding other mineral elements, and then adding secondary water to 1000 mL. In another beaker, 0.31 g NH<sub>4</sub>Cl, 0.13 g KCl, 10.32 g Na<sub>2</sub>HPO<sub>4</sub>-12H<sub>2</sub>O, 3.32 g Na<sub>2</sub>HPO<sub>4</sub>-2H<sub>2</sub>O, 12.5 mL of mineral solution, and 5 mL of diluted vitamin solution, and 2 g of anhydrous CH<sub>3</sub>COONa were added to configure 1,000 mL of anodic solution to be used for anodic anaerobic microbial culture.

**Community analysis see:** [16S\\_rDNA\\_report.htm](#)

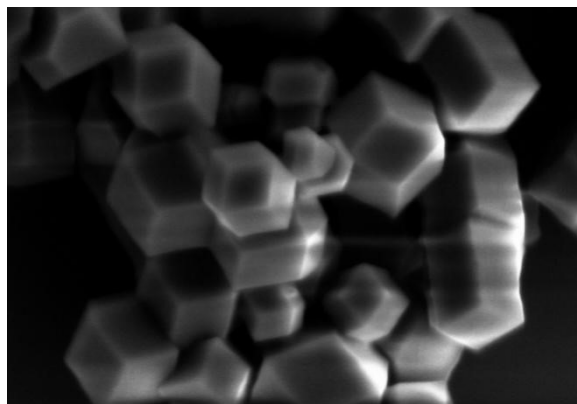

Fig. S1. SEM figure of ZIF-67

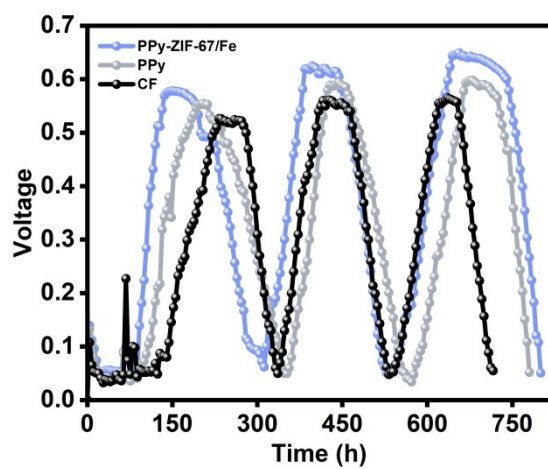

Fig. S2. Voltage variation of MFC with different anode materials.

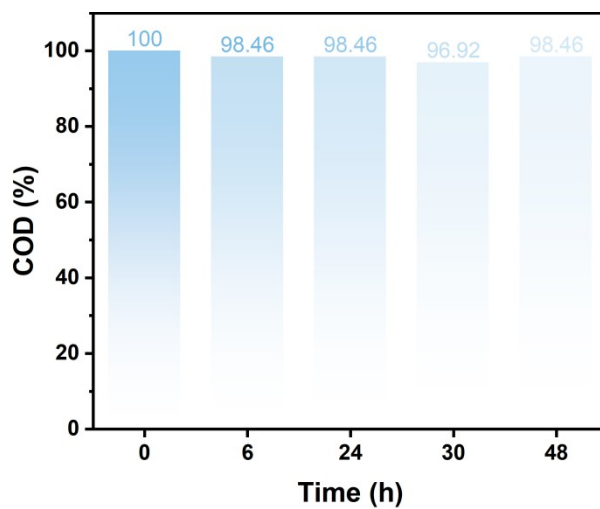

**Fig. S3.** COD percentage change during adsorption on ZIF-67/Fe-PPy electrode.

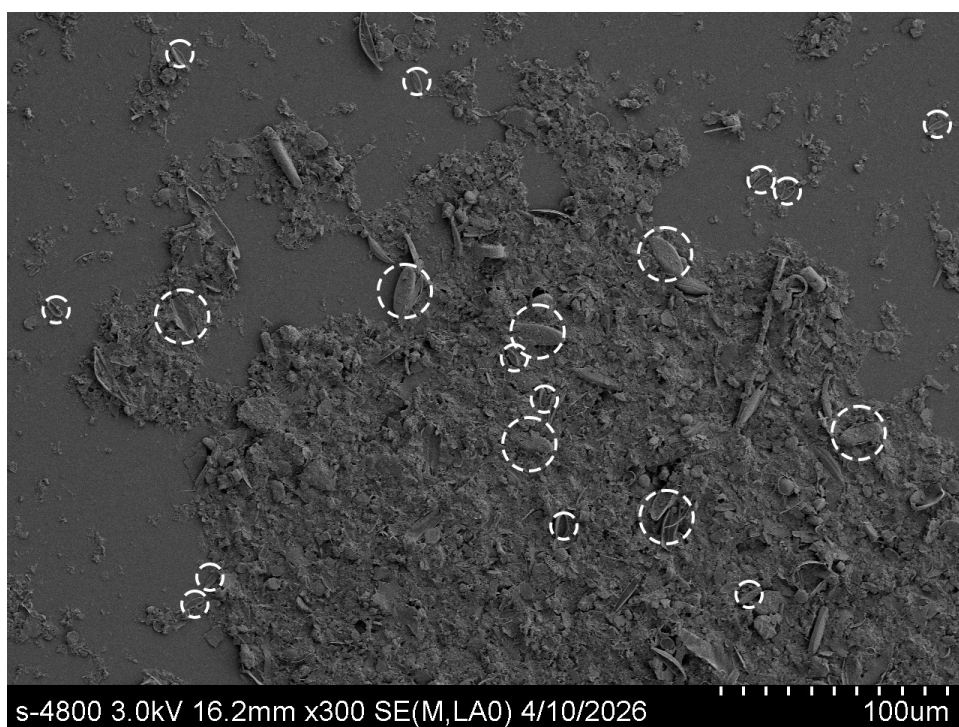

**Fig. S4.** Scanning Electron Microscopy (SEM) image of the supernatant of anode solution.

**Table S1.** The power density of different fuel cells.

| No. | Type of MFC  | Anodic material  | Cathode materials | Power density (mW/m <sup>2</sup> ) | Refs. |
|-----|--------------|------------------|-------------------|------------------------------------|-------|
| 1   | Dual-chamber | Carbon cloth     | Carbon felt       | 337                                | [1]   |
| 2   | Dual-chamber | rGO/Carbon cloth | Carbon felt       | 1062                               | [1]   |
| 3   | Dual-chamber | PTH NP@GF        | carbon cloth      | 800                                | [2]   |
| 4   | Dual-chamber | Ppy-NP@GF        | carbon cloth      | 1220                               | [2]   |
| 5   | Dual-chamber | carbon felt      | ZIF-67/CNFs       | 1191                               | [3]   |
| 6   | Dual-chamber | PPy-CMC-MXene/CC | carbon cloth      | 1800                               | [4]   |
| 7   | Dual-chamber | graphite brush   | Cu/Co-NC@mS-700   | 698                                | [5]   |
| 8   | Dual-chamber | graphite brush   | Cu/Co-NC@mS-800   | 932                                | [5]   |
| 9   | Dual-chamber | graphite brush   | Cu/Co-NC@mS-900   | 806                                | [5]   |

|    |              |                                 |               |      |           |
|----|--------------|---------------------------------|---------------|------|-----------|
| 10 | Dual-chamber | graphite brush                  | Cu/Co-NC-800  | 774  | [5]       |
| 11 | Dual-chamber | Co-Ni-ZIF/TM<br>(Titanium mesh) | graphite rods | 2070 | [6]       |
| 12 | Dual-chamber | ZIF-67/Fe-PPy                   | graphite rods | 2180 | This work |

Table S2. BET surface area of PPy and ZIF-67/Fe-PPy

| Materials     | BET surface area<br>( $\text{m}^2 \cdot \text{g}^{-1}$ ) |
|---------------|----------------------------------------------------------|
| PPy           | 56.9080                                                  |
| ZIF-67/Fe-PPy | 750.1177                                                 |

## References

- [1] Y. Li, J. Liu, X. Chen, X. Yuan, N. Li, W. He, Y. Feng, Enhanced electricity generation and extracellular electron transfer by polydopamine - reduced graphene oxide (PDA - rGO) modification for high-performance anode in microbial fuel cell, *Chem. Eng. J.*, 387 (2020) 123408, 10.1016/j.cej.2019.123408.
- [2] A. Sumisha, K. Haribabu, Modification of graphite felt using nano polypyrrole and polythiophene for microbial fuel cell applications-a comparative study, *Int. J. Hydrogen Energy*, 43(6) (2018) 3308 - 3316, 10.1016/j.ijhydene.2017.12.175.
- [3] N. Jiang, M. Huang, J. Li, J. Song, S. Zheng, Y. Gao, M. Shao, Y. Li, Enhanced bioelectricity output of microbial fuel cells via electrospinning zeolitic imidazolate framework-67/polyacrylonitrile carbon nanofiber cathode, *Bioresource Technol.*, 337 (2021) 125358, 10.1016/j.biortech.2021.125358.

- [4] X. He, X. Tian, Z. Tan, M. Hou, S. Ma, P. Ma, R. Cao, X. Lu, Biomass-derived 3d hydrogel bioanode for increasing electron transfer and chemical oxygen demand removal efficiency, *J. Solid State Electrochem.*, 29 (2025) 2537 – 2549, 10.1007/s10008-024-06162-4.
- [5] N. Jiang, C. Su, J. Li, Y. Zhang, B. Wang, B. Jiang, W. Gao, Mesoporous silica-modified metal organic frameworks derived bimetallic electrocatalysts for oxygen reduction reaction in microbial fuel cells, *Int. J. Hydrogen Energy*, 97 (2025) 571-580, 10.1016/j.ijhydene.2024.11.396.
- [6] L. Yang, F. Li, Q. Wen, Y. Chen, H. Xu, X. Pan, X. Li, Metal zeolite imidazole skeleton-based phosphate derivatives as bioanodes for enhanced microbial fuel cell energy output, *Int. J. Hydrogen Energy*, 47(65) (2022) 28111 – 28124, 10.1016/j.ijhydene.2022.06.146.
